# Supplementary material for: Input-dependent regulation of excitability controls dendritic maturation in somatosensory thalamocortical neurons
Source: PubMed Central journal article supplement (PMC5722950; doi:10.1038/s41467-017-02172-1), 2017-12-08
Supplement: 41467_2017_2172_MOESM1_ESM.pdf [file 41467_2017_2172_MOESM1_ESM.pdf]

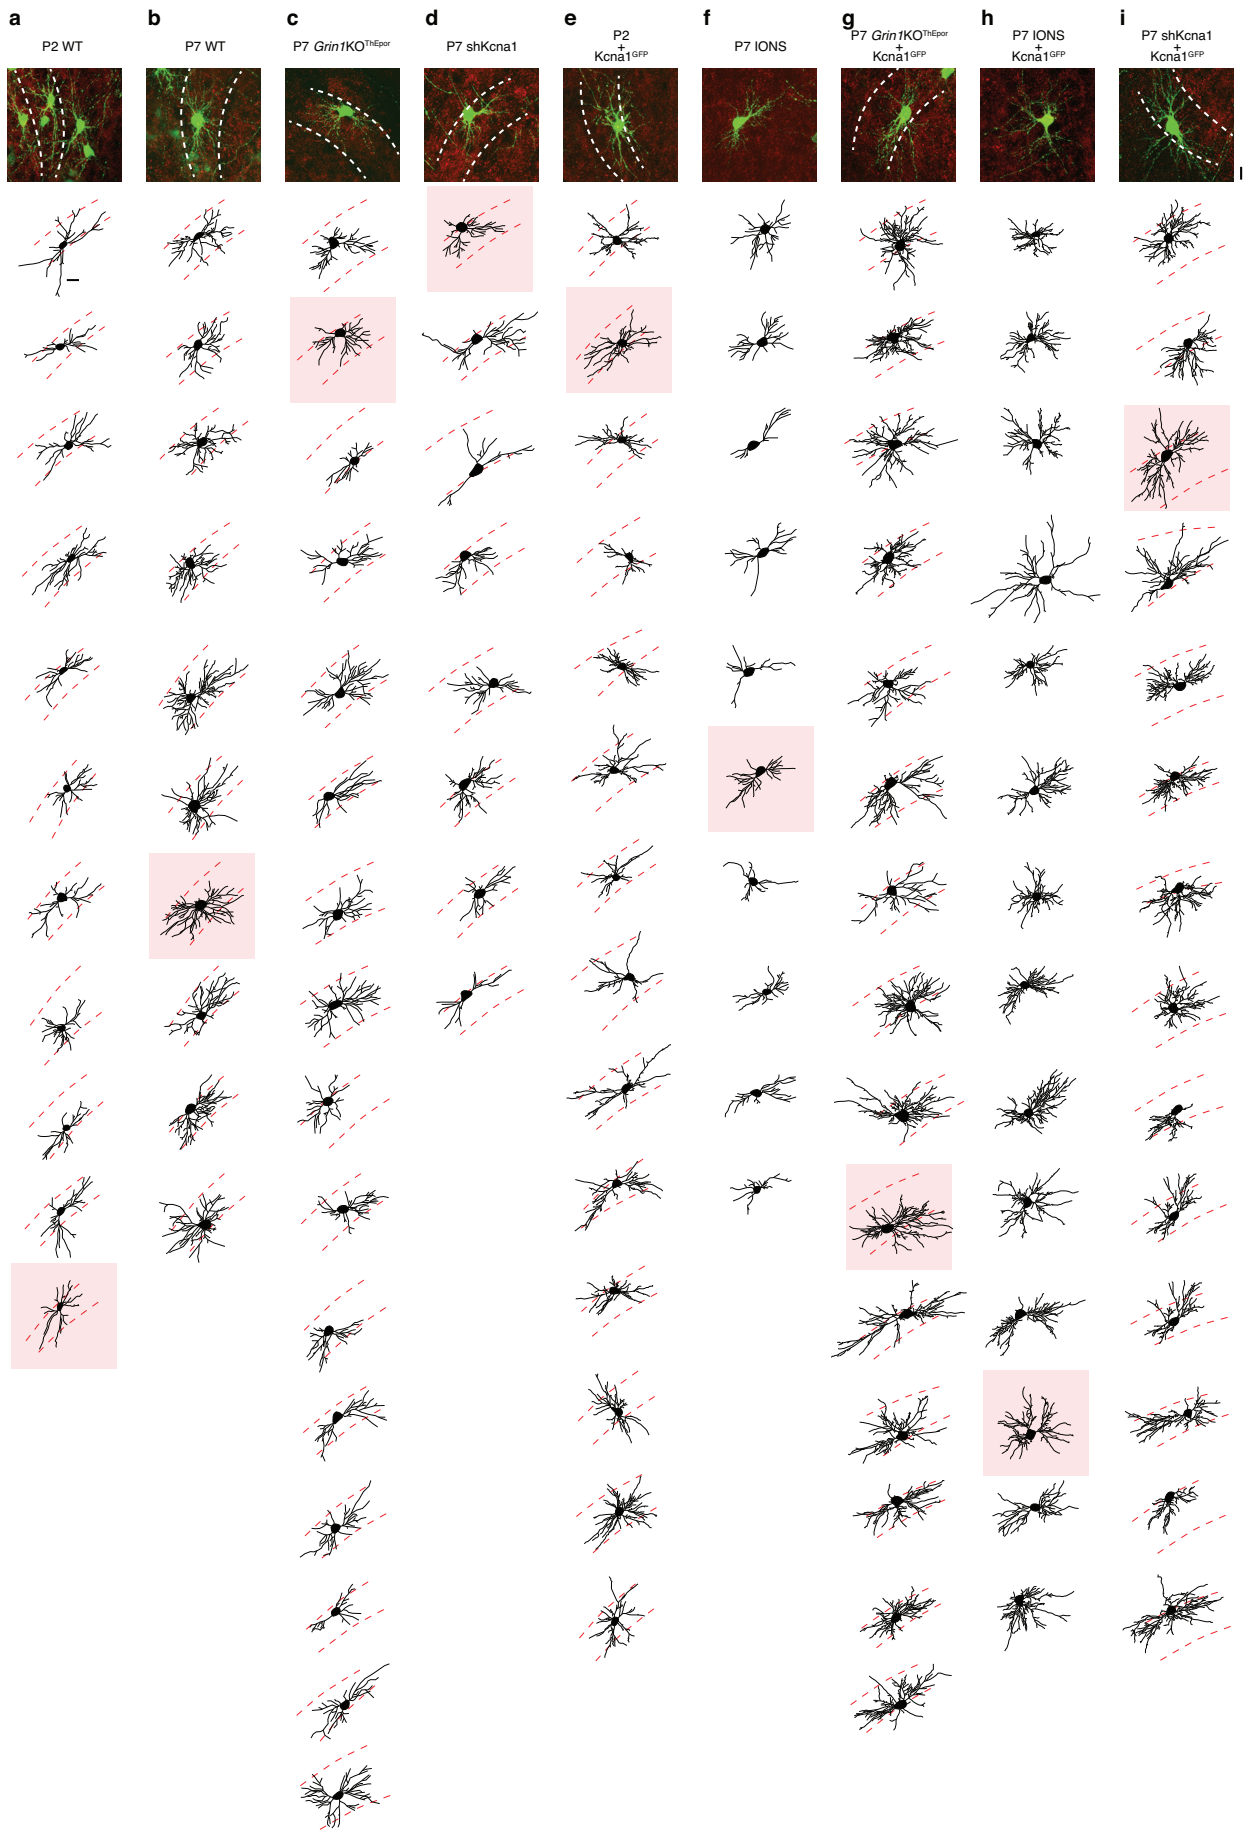

**Supplementary Figure 1**

**Reconstruction of the VPM neurons used for dendritic analyses in this study.**

Photomicrograph example of GFP<sup>+</sup> neurons in the VPM and reconstruction of the VPM neurons for each conditions (pink background highlight reconstructed neurons shown on photomicrograph, red dotted lines delineate barrelloid). Scale bars: 20  $\mu$ m.

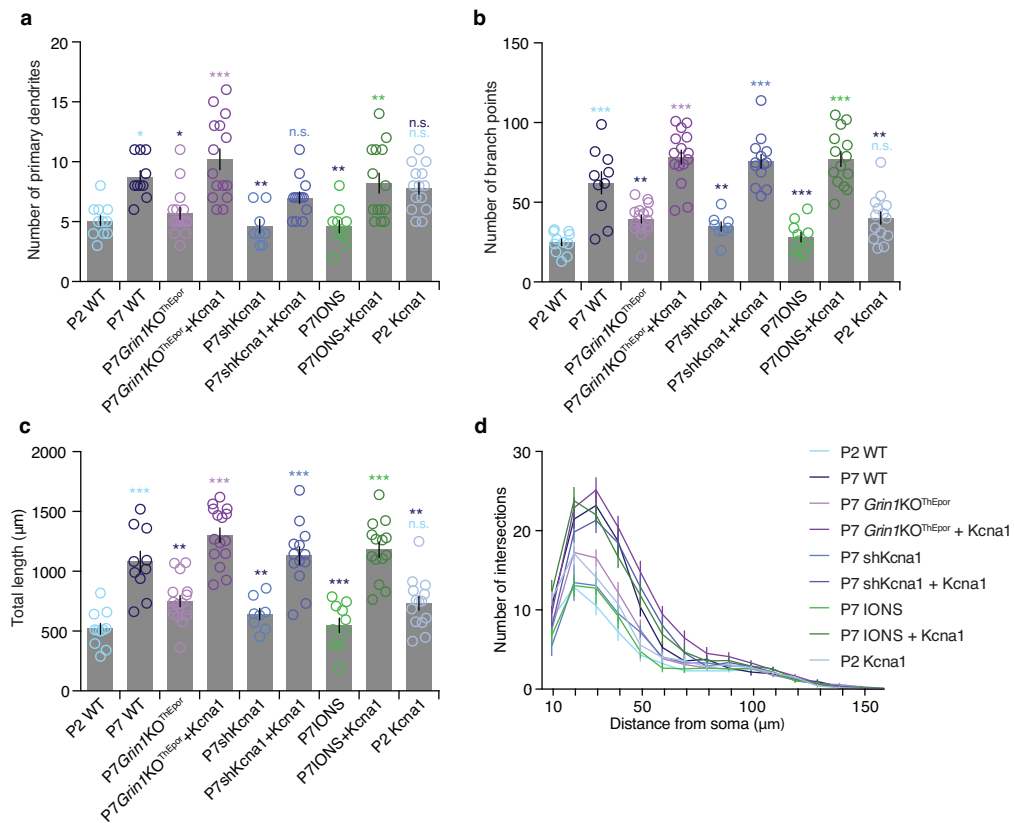

## Supplementary Figure 2

### Quantification of the dendritic complexity of VPM neurons for each experimental condition.

(a) Quantification of the number of primary dendrites for each experimental condition. One-way ANOVA with Tukey post-hoc test; \*  $P < 0.05$ , \*\*  $P < 0.01$ , \*\*\*  $P < 0.001$ , n.s., not significant. (P2 WT ( $n = 11$  cells from 2 mice):  $5.09 \pm 0.41$ ; P7 WT ( $n = 10$  cells from 2 mice):  $8.7 \pm 0.56$ ; P7 *Grin1KO*<sup>ThEpor</sup> ( $n = 16$  cells from 3 mice):  $5.68 \pm 0.48$ ; P7 *Grin1KO*<sup>ThEpor</sup> + Kcna1 ( $n = 15$  cells from 6 mice):  $10.2 \pm 0.88$ ; P7 shKcna1 ( $n = 8$  cells from 2 mice):  $4.62 \pm 0.56$ ; P7 shKcna1 + Kcna1 ( $n = 13$  cells from 4 mice):  $7 \pm 0.46$ ; P7 IONS ( $n = 10$  cells from 2 mice):  $4.6 \pm 0.52$ ; P7 IONS + Kcna1 ( $n = 14$  cells from 7 mice):  $8.21 \pm 0.82$ ; P2 Kcna1 ( $n = 14$  cells from 4 mice):  $7.78 \pm 0.50$ .) (b) Quantification of the number of branch points for each experimental condition. One-way ANOVA with Tukey post-hoc test; \*  $P < 0.05$ , \*\*  $P < 0.01$ , \*\*\*  $P < 0.001$ , n.s., not significant. (P2 WT ( $n = 11$  cells from 2 mice):  $25 \pm 2.03$ ; P7 WT ( $n = 10$  cells from 2 mice):  $62.4 \pm 6.98$ ; P7 *Grin1KO*<sup>ThEpor</sup> ( $n = 16$  cells from 3 mice):  $39.56 \pm 2.38$ ; P7 *Grin1KO*<sup>ThEpor</sup> + Kcna1 ( $n = 15$  cells from 6 mice):  $78.47 \pm 4.42$ ; P7 shKcna1 ( $n = 8$  cells from 2 mice):  $35 \pm 2.88$ ; P7 shKcna1 + Kcna1 ( $n = 13$  cells from 4 mice):  $75.85 \pm 4.32$ ; P7 IONS ( $n = 10$  cells from 2 mice):  $28.4 \pm 3.08$ ; P7 IONS + Kcna1 ( $n = 14$  cells from 7 mice):  $77.36 \pm 4.66$ ; P2 Kcna1 ( $n = 14$  cells from 4 mice):  $40.14 \pm 3.87$ .) (c) Quantification of the number of the total dendritic length for each experimental condition. One-way ANOVA with Tukey post-hoc test; \*  $P < 0.05$ , \*\*  $P < 0.01$ , \*\*\*  $P < 0.001$ , n.s., not significant. (P2 WT ( $n = 11$  cells from 2 mice):  $516.9 \pm 44.97$ ; P7 WT ( $n = 10$  cells from 2 mice):  $1076 \pm 87.65$ ; P7 *Grin1KO*<sup>ThEpor</sup> ( $n = 16$  cells from 3 mice):  $749.3 \pm 46.58$ ; P7 *Grin1KO*<sup>ThEpor</sup> + Kcna1 ( $n = 15$  cells from 6 mice):  $1297 \pm 60.93$ ; P7 shKcna1 ( $n = 8$  cells from 2 mice):  $641.1 \pm 47.47$ ; P7 shKcna1 + Kcna1 ( $n = 13$  cells from 4 mice):  $1126 \pm 74.27$ ; P7 IONS ( $n = 10$  cells from 2 mice):  $547.5 \pm 59.58$ ; P7 IONS + Kcna1 ( $n = 14$  cells from 7 mice):  $1176 \pm 64.24$ ; P2 Kcna1 ( $n = 14$  cells from 4 mice):  $731.1 \pm 56.66$ .) (d) Sholl analysis for each experimental condition. Data are expressed as mean  $\pm$  S.E.M.

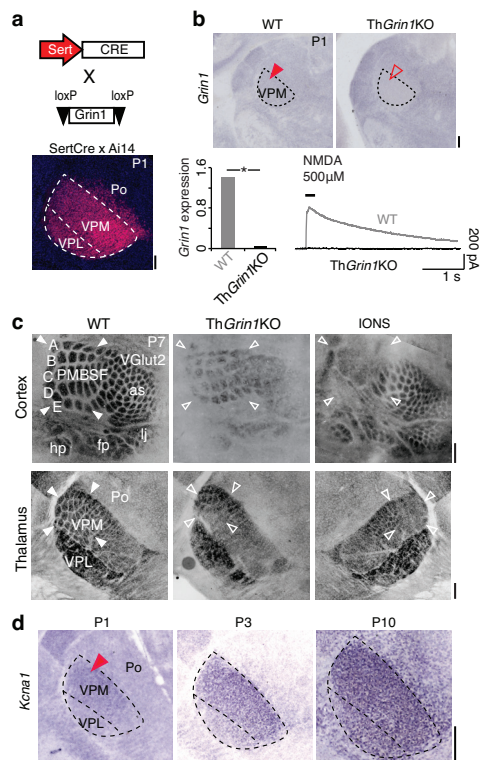

### Supplementary Figure 3

#### Genetic deletion of *Grin1* in VPM neurons impairs the formation of whisker-specific patterns.

(a) Top: Th*Grin1*KO mice were obtained by SertCre-mediated recombination of the *Grin1* floxed alleles. Bottom: Coronal section of Red Fluorescent Protein (RFP) expression driven by SertCre showing the specific recombination in the VPM. Scale bar: 100  $\mu$ m. (b) Top: *In situ* hybridization for *Grin1* in coronal section of P1 brains (empty arrow shows the lack of *Grin1* in the VPM). Bottom left: qPCR analysis of *Grin1* mRNA expression in the VPM neurons of control and Th*Grin1*KO mice. Student's *t* test; \*  $P < 0.05$ . Bottom right: Currents evoked by NMDA (500  $\mu$ M) puff application. Absence of response reflects the lack of NMDAR-mediated excitation in VPM of Th*Grin1*KO. Scale bar: 200  $\mu$ m. (c) Flattened cortex and coronal thalamic sections of P7 brains stained for VGLut2 reveal that whisker-related patterns fail to develop in Th*Grin1*KO mice as well as after infraorbital nerve section. Scale bar: 200  $\mu$ m. (d) *In situ* hybridization for *Kcna1* showing its developmental expression. Scale bar: 250  $\mu$ m.

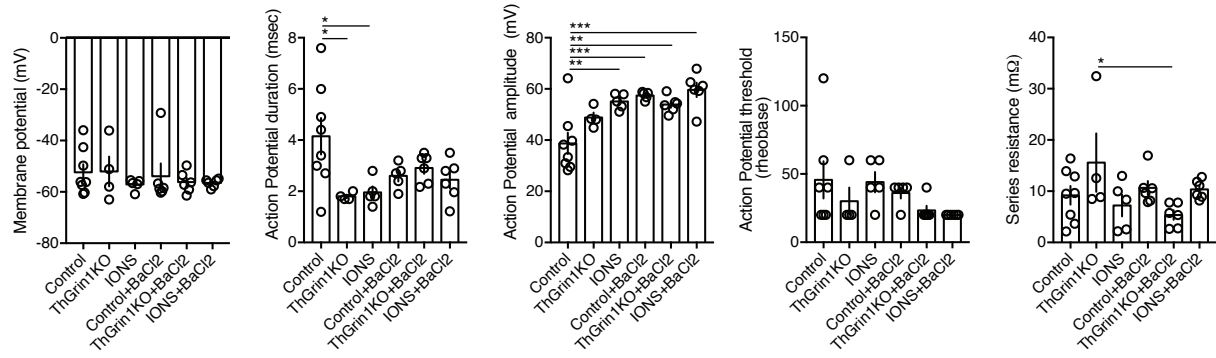

**Supplementary Figure 4**

**Analysis of electrophysiological parameters at P15.**

Graphical representation of the different electrophysiological parameters measured in Supplementary Table 2. One-way ANOVA with Tukey post-hoc test, \*  $P < 0.05$ , \*\*  $P < 0.01$ , \*\*\*  $P < 0.001$ .

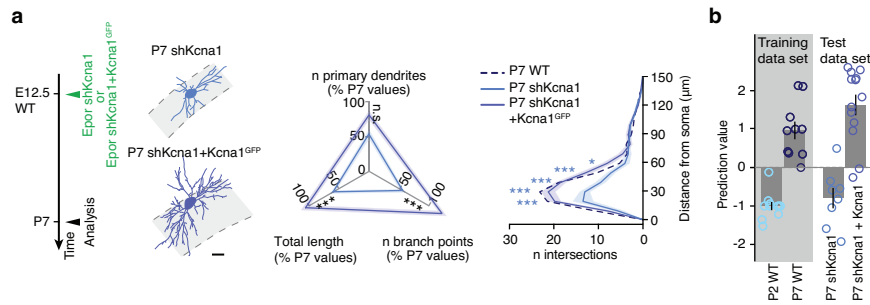

### Supplementary Figure 5

#### *Kcna1* is important for the normal development of VPM neurons.

(a) Overexpression of the human *Kcna1* rescues VPM neurons that were electroporated with shKcna1 (P7 shKcna1+Kcna1<sup>GFP</sup>  $n = 14$ , from 4 mice). P7 WT data reported from Fig. 1b for the Sholl analysis. One-way ANOVA with Tukey post-hoc test; \*  $P < 0.05$ , \*\*\*  $P < 0.001$ , n.s., not significant. Scale bar: 20 μm. (b) Linear model using dendritic complexity characteristics of P2 and P7 control VPM neurons as training sets. Dendritic complexity is restored back to control levels following human *Kcna1* overexpression.

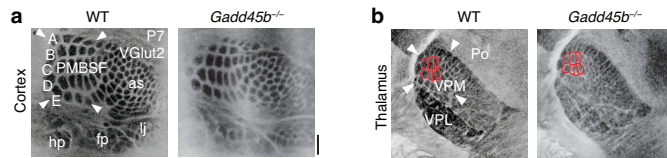

### Supplementary Figure 6

**Genetic deletion of *Gadd45b* does not detectably affect on the formation of whisker-specific patterns.**

Flattened cortex (a) and thalamic coronal section (b) of P7 brains stained for VGlut2 reveal that whisker-related patterns develop normally in *Gadd45b*<sup>-/-</sup> mice. Scale bars: 200  $\mu$ m.

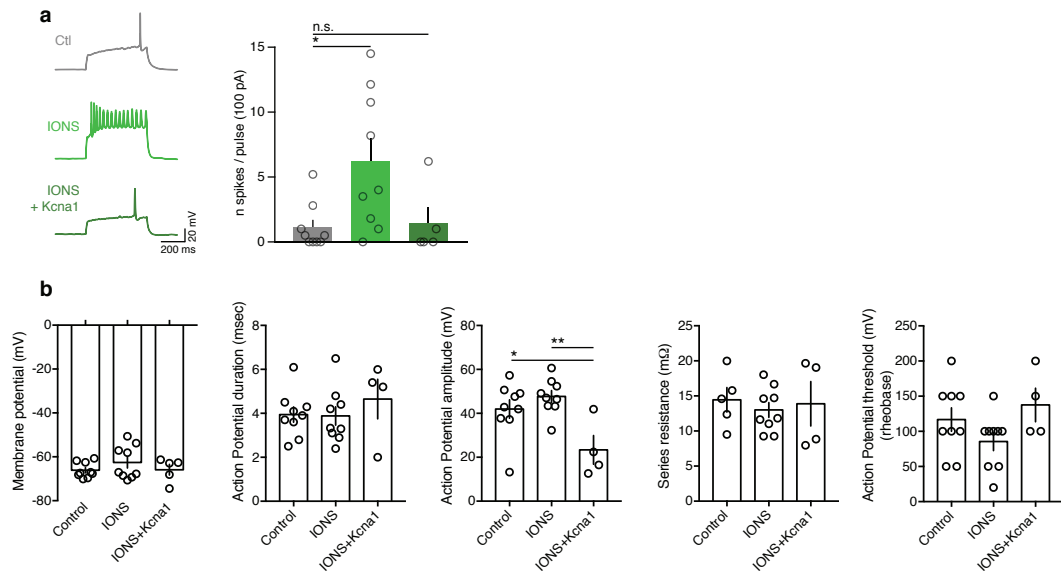

### Supplementary Figure 7

#### Neuronal hyperexcitability is already present at P7 after IONS.

(a) At P7, IONS already leads to increased excitability of VPM neurons, which is rescued by Kcna1 overexpression (Ctl  $n = 9$  cells from 4 mice, IONS  $n = 9$  cells from 2 mice, IONS+Kcna1  $n = 5$  cells from 2 mice). One-way ANOVA with Tukey post-hoc test, \*  $P < 0.05$ , n.s.: not significant. (b) Graphical representation of the different electrophysiological parameters measured in Supplementary Table 3. One-way ANOVA with Tukey post-hoc test, \*  $P < 0.05$ , \*\*  $P < 0.01$ .

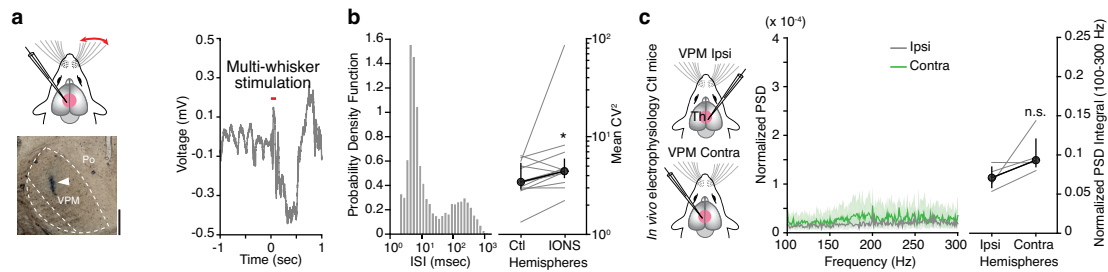

### Supplementary Figure 8

#### Effect of IONS on VPM neurons *in vivo*.

(a) Example of an evoked local field potential (LFP) response from a control VPM after multi-whisker stimulation. The trace is aligned to the beginning of the stimulus, which lasted for 100 msec. Inset: Pipette track, marked with Chicago Sky Blue, in the VPM. Scale bar: 100  $\mu\text{m}$ . (b) Analysis of single-unit inter-spike intervals (ISIs). Left: Example histogram of ISIs (expressed as probability density function, PDF) from an identified unit. The bimodal shape of the distribution indicates that the unit displayed bursting. Right: Summary plot of the mean squared coefficient of variation ( $CV^2$ ) of ISI distribution, a measure of burstiness, for all deprived mice. Each grey line represents the mean  $CV^2$  across all bursting units for each mouse ( $n = 12$ ) between the two hemispheres (Wilcoxon Signed-Rank test;  $P \sim 0.03$ ). (c) Center: Example power spectral density (PSD) estimates from the two hemispheres of a control mouse. The traces have been down-sampled to 1Hz for visualization and the scale is the same as in Figure 4. Right: Summary plot of the normalized PSD integral for all control mice ( $n = 4$ ; Wilcoxon Signed-Rank test; n.s. not significant  $P = 0.25$ ).



Supplementary Table 1

## Transcripts expression up- or downregulated in ThGrinKO

| Downregulated genes      | symbol      | MeanA      | MeanB      | absFC      | log2FC     | p_value    | fdr        |
|--------------------------|-------------|------------|------------|------------|------------|------------|------------|
| 1449536_at Kcnn1         | Kcnn1       | 7.54898822 | 3.88791294 | 1.94165567 | 0.95728738 | 7.53E-45   | 1.73E-40   |
| 1418155_at Myot          | Myot        | 6.42527499 | 3.1388015  | 2.04704725 | 1.0335444  | 2.57E-38   | 2.95E-34   |
| 1426438_at Ddx3y         | Ddx3y       | 10.1952975 | 7.33332137 | 1.3902701  | 0.4753652  | 4.78E-34   | 3.66E-30   |
| 1437968_at Grin1         | Grin1       | 5.70223008 | 2.72542899 | 2.09223212 | 1.06504292 | 1.83E-33   | 1.05E-29   |
| 1417210_at Eif2s3y       | Eif2s3y     | 9.94246174 | 7.06371454 | 1.40754014 | 0.49317606 | 1.20E-26   | 5.50E-23   |
| 1423171_at Gpr88         | Gpr88       | 8.38819309 | 5.80187604 | 1.44577255 | 0.5318406  | 6.15E-26   | 2.35E-22   |
| 1454608_x_at Ttr         | Ttr         | 4.28703637 | 2.67767343 | 1.60103033 | 0.67900064 | 7.83E-25   | 2.56E-21   |
| 1450971_at Gadd45b       | Gadd45b     | 7.69195855 | 5.14822941 | 1.49409786 | 0.57927465 | 8.69E-20   | 2.49E-16   |
| 1449773_s_at Gadd45b     | Gadd45b     | 7.49436452 | 5.03779678 | 1.4876274  | 0.57301323 | 1.04E-19   | 2.64E-16   |
| 1457651_x_at Rem2        | Rem2        | 9.06932261 | 6.90093668 | 1.31421618 | 0.39420261 | 6.83E-15   | 1.57E-11   |
| 1448860_at Rem2          | Rem2        | 8.78698782 | 7.02608892 | 1.25062292 | 0.32264686 | 6.59E-13   | 1.37E-09   |
| 1422861_s_at Pdlim5      | Pdlim5      | 4.51615329 | 3.38198654 | 1.33535519 | 0.41722354 | 1.85E-12   | 3.54E-09   |
| 1452077_at Ddx3y         | Ddx3y       | 8.29120349 | 6.64249099 | 1.24820696 | 0.31985716 | 3.36E-12   | 5.92E-09   |
| 1455913_x_at Ttr         | Ttr         | 3.94035815 | 3.17949207 | 1.23930429 | 0.30953046 | 3.89E-11   | 6.37E-08   |
| 1437385_at Ccbe1         | Ccbe1       | 6.89563886 | 5.3346867  | 1.29260428 | 0.37028067 | 4.33E-11   | 6.61E-08   |
| 1448468_a_at Kcnab1      | Kcnab1      | 7.72049528 | 6.87800242 | 1.12249092 | 0.16670378 | 3.60E-10   | 5.16E-07   |
| 1419617_at Kcnn1         | Kcnn1       | 6.6221406  | 5.04633457 | 1.31226745 | 0.39206178 | 8.43E-10   | 1.14E-06   |
| 1421413_a_at Pdlim5      | Pdlim5      | 5.62166038 | 4.56723786 | 1.23086656 | 0.29967437 | 1.31E-08   | 1.59E-05   |
| 1450786_x_at Pdlim5      | Pdlim5      | 7.17649662 | 5.77726214 | 1.24219681 | 0.31289377 | 1.42E-08   | 1.63E-05   |
| 1429783_s_at Pdlim5      | Pdlim5      | 11.5386961 | 10.1695102 | 1.13463636 | 0.18223    | 2.39E-08   | 2.58E-05   |
| 1424903_at Kdm5d         | Kdm5d       | 6.0538649  | 4.55303398 | 1.32963315 | 0.41102825 | 3.05E-08   | 3.04E-05   |
| 1426439_at Ddx3y         | Ddx3y       | 8.18990649 | 6.79950445 | 1.20448579 | 0.26841737 | 3.18E-08   | 3.04E-05   |
| 1445703_at Ptchd1        | Ptchd1      | 5.98660415 | 3.90902909 | 1.53148109 | 0.61492756 | 5.37E-08   | 4.93E-05   |
| 1448927_at Kcnn2         | Kcnn2       | 6.6766773  | 5.61540133 | 1.18899379 | 0.24974118 | 2.06E-07   | 0.00017503 |
| 1434802_s_at Ntf3        | Ntf3        | 6.06511064 | 4.41765558 | 1.37292519 | 0.45725302 | 3.12E-07   | 0.00025571 |
| 1444062_at 2900056L01Rik | 2900056L01R | 8.31574502 | 6.74454555 | 1.23295854 | 0.30212429 | 3.90E-07   | 0.00030367 |
| 1443230_at NA            | NA          | 5.12844178 | 4.00878844 | 1.27929968 | 0.35535426 | 8.11E-07   | 0.00059523 |
| 1447846_x_at Mboat7      | Mboat7      | 4.05478423 | 3.33717693 | 1.21503424 | 0.28099697 | 8.30E-07   | 0.00059523 |
| 1417150_at Slc6a4        | Slc6a4      | 11.6236077 | 10.5204844 | 1.1048548  | 0.14385679 | 1.21E-06   | 0.00083907 |
| 1418784_at GriK5         | GriK5       | 5.87500315 | 4.72059158 | 1.24454807 | 0.31562196 | 2.69E-06   | 0.00166994 |
| 1417943_at Gng4          | Gng4        | 8.95073477 | 7.93075803 | 1.12861025 | 0.17454735 | 2.84E-06   | 0.00168053 |
| 1442710_at NA            | NA          | 4.53750006 | 3.33785591 | 1.35940561 | 0.44297599 | 2.90E-06   | 0.00168053 |
| 1448416_at Mgp           | Mgp         | 5.13321054 | 4.39871658 | 1.16697915 | 0.22277879 | 2.93E-06   | 0.00168053 |
| 1437230_at Kcna1         | Kcna1       | 8.54590484 | 7.46446621 | 1.14487823 | 0.19519416 | 3.85E-06   | 0.00215314 |
| 1452173_at Hadha         | Hadha       | 5.85039357 | 4.96377048 | 1.17861887 | 0.23709727 | 4.11E-06   | 0.00224339 |
| 1427445_a_at Ttn         | Ttn         | 6.86030785 | 5.53684366 | 1.23902864 | 0.30920953 | 7.34E-06   | 0.00370891 |
| 1425845_a_at Shoc2       | Shoc2       | 3.81687962 | 3.17354052 | 1.20271967 | 0.26630042 | 7.35E-06   | 0.00370891 |
| 1421402_at Mta3          | Mta3        | 6.66245918 | 6.60656673 | 1.00846014 | 0.01215406 | 8.24E-06   | 0.00390597 |
| 1439908_at Zkscan1       | Zkscan1     | 5.35270982 | 4.07636039 | 1.31311006 | 0.39298784 | 8.35E-06   | 0.00390597 |
| 1441952_x_at Lynx1       | Lynx1       | 8.17775889 | 7.12251507 | 1.14815607 | 0.19931876 | 8.74E-06   | 0.00401003 |
| 1429504_at NA            | NA          | 5.74126471 | 5.03867985 | 1.13943828 | 0.18832278 | 1.18E-05   | 0.00492219 |
| 1423487_at Cript         | Cript       | 6.34476768 | 5.57434488 | 1.13820867 | 0.18676508 | 1.53E-05   | 0.00628395 |
| 1456330_at Pcgf2         | Pcgf2       | 4.09812883 | 3.39441211 | 1.20731623 | 0.27180361 | 1.79E-05   | 0.00698943 |
| 1440171_x_at Zfp974      | Zfp974      | 7.41278364 | 6.49918409 | 1.14057142 | 0.18975679 | 1.80E-05   | 0.00698943 |
| 1442849_at Lrp1          | Lrp1        | 6.08028882 | 4.08508005 | 1.48841363 | 0.5737755  | 1.97E-05   | 0.00740628 |
| 1445124_at A930009L07Rik | A930009L07R | 5.97036702 | 5.17692993 | 1.15326402 | 0.20572283 | 2.12E-05   | 0.0076037  |
| 1456606_a_at NA          | NA          | 9.32200183 | 8.30481915 | 1.12248101 | 0.16669104 | 2.41E-05   | 0.00850899 |
| 1455785_at Kcna1         | Kcna1       | 10.2347898 | 9.33483775 | 1.09640789 | 0.13278462 | 2.52E-05   | 0.0087668  |
| 1438516_at NA            | NA          | 3.95591404 | 3.11649861 | 1.26934568 | 0.34408501 | 2.77E-05   | 0.00947847 |
| 1436239_at Slc5a5        | Slc5a5      | 5.34219175 | 4.61801885 | 1.15681462 | 0.2101577  | 3.18E-05   | 0.01040943 |
| 1436685_at Fam181a       | Fam181a     | 6.34127755 | 5.32869041 | 1.19002551 | 0.25099251 | 3.41E-05   | 0.01100315 |
| 1436176_at 1500004A13Rik | 1500004A13R | 4.07761099 | 3.54659695 | 1.14972495 | 0.20128876 | 3.70E-05   | 0.01160915 |
| 1452324_at Pvt1          | Pvt1        | 7.83812082 | 6.85738254 | 1.14301933 | 0.19284981 | 3.88E-05   | 0.01203253 |
| 1418991_at Bak1          | Bak1        | 5.49985448 | 5.05964202 | 1.08700467 | 0.12035813 | 4.54E-05   | 0.01388252 |
| 1456161_at 0610040B10Rik | 0610040B10R | 3.55317541 | 3.0182217  | 1.17724136 | 0.23541013 | 6.09E-05   | 0.01789361 |
| 1442038_at Rbm26         | Rbm26       | 6.64094609 | 5.51005211 | 1.20524198 | 0.26932282 | 6.36E-05   | 0.01845215 |
| 1445676_at NA            | NA          | 8.02809574 | 6.58230113 | 1.21964881 | 0.28646579 | 6.66E-05   | 0.0186709  |
| 1431595_at 2900064B16Rik | 2900064B16R | 5.07355759 | 4.12477071 | 1.23002173 | 0.2986838  | 6.68E-05   | 0.0186709  |
| 1457633_x_at Cox6a2      | Cox6a2      | 5.84291245 | 4.73669039 | 1.23354325 | 0.3028083  | 6.99E-05   | 0.01899632 |
| 1422053_at Inhba         | Inhba       | 5.82024017 | 5.29275312 | 1.09966213 | 0.13706033 | 7.05E-05   | 0.01899632 |
| 1440893_at Riok1         | Riok1       | 5.15948902 | 4.34630648 | 1.18709738 | 0.24743828 | 7.12E-05   | 0.01899632 |
| 1417416_at Kcna1         | Kcna1       | 8.74008555 | 7.80753564 | 1.11944229 | 0.16278015 | 9.00E-05   | 0.02243407 |
| 1435610_at Fam19a4       | Fam19a4     | 7.94489286 | 7.17971554 | 1.10657488 | 0.14610108 | 9.51E-05   | 0.02319582 |
| 1438160_x_at Slco4a1     | Slco4a1     | 4.6114182  | 3.23788064 | 1.42420883 | 0.5101607  | 0.00010759 | 0.02543977 |
| 1453622_s_at MlIt3       | MlIt3       | 3.98687041 | 3.44356132 | 1.15777535 | 0.21135535 | 0.00011687 | 0.02728    |
| 1447669_s_at Gng4        | Gng4        | 13.459942  | 12.3530592 | 1.08960394 | 0.12380382 | 0.00012223 | 0.02803299 |
| 1425248_a_at Tyro3       | Tyro3       | 8.44876419 | 7.79257159 | 1.08420745 | 0.11664083 | 0.00012667 | 0.02876393 |
| 1423551_at Cdh13         | Cdh13       | 9.33682327 | 8.49261678 | 1.09940475 | 0.13672262 | 0.00013556 | 0.03048    |
| 1438798_at 4931406P16Rik | 4931406P16R | 5.66224323 | 4.35380835 | 1.30052652 | 0.37909582 | 0.00017854 | 0.0375666  |
| 1434273_at Fam174b       | Fam174b     | 5.81208325 | 5.02830209 | 1.15587392 | 0.20898404 | 0.0001981  | 0.04056652 |
| 1433529_at Pamr1         | Pamr1       | 4.17576175 | 3.55564922 | 1.17440205 | 0.2319264  | 0.00022501 | 0.04448702 |

| Upregulated genes        | symbol       | MeanA      | MeanB      | absFC      | log2FC     | p_value    | fdr        |
|--------------------------|--------------|------------|------------|------------|------------|------------|------------|
| 1437434_a_at Wls         | Wls          | 5.40235181 | 7.28321078 | 1.34815559 | -0.430987  | 1.42E-09   | 1.80E-06   |
| 1416147_at Hspa4         | Hspa4        | 4.60551987 | 6.67342531 | 1.44900587 | -0.5350634 | 2.47E-08   | 2.58E-05   |
| 1440343_at NA            | NA           | 6.42623886 | 7.94722103 | 1.23668311 | -0.3064759 | 1.28E-07   | 0.00011307 |
| 1432249_a_at Ercc8       | Ercc8        | 2.77806    | 4.05656237 | 1.46021409 | -0.5461799 | 3.97E-07   | 0.00030367 |
| 1456005_a_at Bcl2l11     | Bcl2l11      | 6.84856766 | 7.52717026 | 1.09908679 | -0.1363053 | 1.56E-06   | 0.00105432 |
| 1450073_at Kif3b         | Kif3b        | 6.17776734 | 6.93987525 | 1.123363   | -0.1678242 | 1.99E-06   | 0.0013008  |
| 1422450_at Ctnnd1        | Ctnnd1       | 2.64171024 | 3.83285169 | 1.45089784 | -0.5369459 | 2.18E-06   | 0.00138925 |
| 1439854_at Hrk           | Hrk          | 7.8720574  | 8.99193322 | 1.14225961 | -0.1918906 | 4.45E-06   | 0.00237119 |
| 1442845_at C130075A20Rik | C130075A20   | 4.57130107 | 5.28231295 | 1.15553819 | -0.2085649 | 7.44E-06   | 0.00370891 |
| 1436464_at LOC102632463  | LOC102632463 | 6.77388777 | 8.11140937 | 1.19745258 | -0.2599685 | 8.22E-06   | 0.00390597 |
| 1435419_at Rgag4         | Rgag4        | 6.40809869 | 7.67140609 | 1.19714231 | -0.2595947 | 9.15E-06   | 0.00411446 |
| 1416459_at Arf2          | Arf2         | 5.21629571 | 6.34235815 | 1.21587396 | -0.2819937 | 9.78E-06   | 0.00431362 |
| 1415904_at Lpl           | Lpl          | 5.58574253 | 6.65968408 | 1.19226478 | -0.2537047 | 1.06E-05   | 0.0045734  |
| 1460092_at NA            | NA           | 3.88683053 | 4.83230793 | 1.24325151 | -0.3141182 | 1.15E-05   | 0.00486383 |
| 1420841_at Ptpnf         | Ptpnf        | 2.91471899 | 3.86557044 | 1.32622406 | -0.4073245 | 1.71E-05   | 0.00689682 |
| 1437241_at Klf11         | Klf11        | 7.57800228 | 8.96193039 | 1.1826244  | -0.2419919 | 1.86E-05   | 0.00709599 |
| 1432419_a_at Mob2        | Mob2         | 2.90585227 | 4.0131683  | 1.38106412 | -0.4657803 | 2.09E-05   | 0.0076037  |
| 1452106_at Npnt          | Npnt         | 6.69419519 | 8.05816484 | 1.20375409 | -0.2675407 | 2.09E-05   | 0.0076037  |
| 1448754_at Rbp1          | Rbp1         | 3.72587033 | 4.40129152 | 1.18127877 | -0.2403495 | 2.92E-05   | 0.00983194 |
| 1437180_at Snrnp48       | Snrnp48      | 5.19214945 | 5.95128763 | 1.14620885 | -0.1968699 | 3.16E-05   | 0.01040943 |
| 1428837_at Klfh14        | Klfh14       | 8.38597368 | 9.24588842 | 1.10254203 | -0.1408336 | 3.57E-05   | 0.01138436 |
| 1417658_at Tbrg4         | Tbrg4        | 4.8400634  | 5.03037465 | 1.03931999 | -0.0556399 | 4.63E-05   | 0.01394567 |
| 1420644_a_at Sec61a2     | Sec61a2      | 5.27344307 | 7.17756388 | 1.36107734 | -0.444749  | 4.68E-05   | 0.01394567 |
| 1439041_at Slc39a10      | Slc39a10     | 5.46585502 | 6.90026973 | 1.2624319  | -0.3362056 | 6.59E-05   | 0.0186709  |
| 1441848_at NA            | NA           | 3.38525077 | 3.41073672 | 1.00752853 | -0.0108207 | 7.00E-05   | 0.01899632 |
| 1431746_a_at Uba3        | Uba3         | 7.1195885  | 8.49768782 | 1.19356446 | -0.2552765 | 7.61E-05   | 0.01991758 |
| 1451117_a_at Tom1l1      | Tom1l1       | 3.69475037 | 5.27657059 | 1.42812641 | -0.5141237 | 7.64E-05   | 0.01991758 |
| 1426324_at NA            | NA           | 5.15389264 | 5.26367732 | 1.02130131 | -0.0304086 | 7.87E-05   | 0.02027214 |
| 1459713_s_at Ano1        | Ano1         | 3.71899024 | 4.3117751  | 1.15939404 | -0.213371  | 8.38E-05   | 0.02136115 |
| 1421922_at Sh3bp5        | Sh3bp5       | 7.56451428 | 9.14363077 | 1.20875319 | -0.2735197 | 8.48E-05   | 0.02136273 |
| 1423963_at Wdr26         | Wdr26        | 5.85862482 | 6.78309211 | 1.15779595 | -0.211381  | 9.11E-05   | 0.02246112 |
| 1458250_at Fam13c        | Fam13c       | 3.3075387  | 3.77059462 | 1.14000015 | -0.189034  | 9.64E-05   | 0.02326332 |
| 1427390_at Bloc1s3       | Bloc1s3      | 6.22527336 | 7.10084516 | 1.14064793 | -0.1898536 | 9.78E-05   | 0.02335698 |
| 1433184_at 6720477C19Rik | 6720477C19   | 5.51703014 | 6.0290549  | 1.09280804 | -0.12804   | 0.00011776 | 0.02728    |
| 1460279_a_at Gtf2i       | Gtf2i        | 3.2320343  | 4.01902814 | 1.24349798 | -0.3144042 | 0.00013829 | 0.030792   |
| 1455063_at Rmdn2         | Rmdn2        | 5.32167778 | 5.94149829 | 1.11647088 | -0.1589456 | 0.00014753 | 0.03253476 |
| 1437587_at NA            | NA           | 3.29915321 | 3.85176073 | 1.16749981 | -0.2234223 | 0.00015243 | 0.03329431 |
| 1450008_a_at Ctnnb1      | Ctnnb1       | 8.81597134 | 10.3547532 | 1.17454479 | -0.2321017 | 0.00015554 | 0.03332801 |
| 1452899_at Rian          | Rian         | 10.1896717 | 11.4686886 | 1.12552091 | -0.1705929 | 0.00015666 | 0.03332801 |
| 1441886_at Terb1         | Terb1        | 3.75517478 | 3.92497062 | 1.0452165  | -0.0638018 | 0.00015694 | 0.03332801 |
| 1430143_at 4930426D05Rik | 4930426D05   | 7.09298425 | 7.81805301 | 1.10222337 | -0.1404166 | 0.00018346 | 0.03825091 |
| 1435363_at Plekhg1       | Plekhg1      | 9.31361311 | 10.3246962 | 1.10855971 | -0.1486865 | 0.00018755 | 0.03875171 |
| 1452373_at Kansl1        | Kansl1       | 7.69374603 | 8.51137153 | 1.10627144 | -0.1457054 | 0.00021167 | 0.04275717 |
| 1433989_at Slc6a11       | Slc6a11      | 5.52138403 | 6.68197348 | 1.21019901 | -0.2752443 | 0.00021253 | 0.04275717 |
| 1437630_at Lsg1          | Lsg1         | 3.52898241 | 4.68145844 | 1.3265746  | -0.4077058 | 0.00021513 | 0.04290347 |
| 1455629_at Drd1          | Drd1         | 4.38025192 | 5.52076013 | 1.26037503 | -0.3338531 | 0.00023364 | 0.04579855 |
| 1421491_a_at Vmp1        | Vmp1         | 5.90245515 | 7.31617029 | 1.23951307 | -0.3097735 | 0.00023708 | 0.04608075 |

Supplementary Table 2

Electrophysiology data analysis at P15

| Control | n spikes/pulse (400pA) | Vm         | AP width (ms) | AP height (mV) | Series resistance (mOhm) | AP threshold (rheobase) (pA) |
|---------|------------------------|------------|---------------|----------------|--------------------------|------------------------------|
| 1       | 10                     | -42.570669 | 2.7           | 38.21          | 12.89004444              | 20                           |
| 2       | 2                      | -49.761187 | 1.2           | 64.16          | 3.645275                 | 20                           |
| 3       | 5                      | -56.083052 | 3.4           | 39.77          | 9.529096154              | 20                           |
| 4       | 3                      | -60.294048 | 4.4           | 33.37          | 16.391                   | 40                           |
| 5       | 5                      | -56.19014  | 4.9           | 30.95          | 9.664821111              | 60                           |
| 6       | 9                      | -57.282396 | 6             | 29.56          | 13.90977692              | 40                           |
| 7       | 4                      | -35.952788 | 7.6           | 28.25          | 2.145673846              | 120                          |
| 8       | no data                | -60.787719 | 3             | 45.5           | 5.418285714              | no data                      |

  

| ThGrin1KO | n spikes/pulse (400pA) | Vm         | AP width (ms) | AP height (mV) | Series resistance (mOhm) | AP threshold (rheobase) (pA) |
|-----------|------------------------|------------|---------------|----------------|--------------------------|------------------------------|
| 1         | 25                     | -51.084716 | 1.7           | 48.01          | 8.843417778              | 60                           |
| 2         | 30                     | -62.935332 | 1.7           | 54.19          | 12.5483                  | 20                           |
| 3         | 12                     | -36.131114 | 2             | 48.31          | 8.482217273              | 20                           |
| 4         | 28                     | -57.98335  | 1.8           | 44.82          | 32.44751286              | 20                           |

  

| IONS | n spikes/pulse (400pA) | Vm         | AP width (ms) | AP height (mV) | Series resistance (mOhm) | AP threshold (rheobase) (pA) |
|------|------------------------|------------|---------------|----------------|--------------------------|------------------------------|
| 1    | 30                     | -56.582169 | 2             | 51.1           | 8.335879048              | 40                           |
| 2    | 29                     | -55.427586 | 1.8           | 55.12          | 2.195732308              | 40                           |
| 3    | 40                     | -55.767395 | 2.8           | 53.18          | 2.550289167              | 20                           |
| 4    | 42                     | -56.969757 | 1.4           | 58.13          | 12.9674375               | 60                           |
| 5    | 42                     | -60.913021 | 1.8           | 57.93          | 9.99093                  | 60                           |

  

| Control+BaCl2 | n spikes/pulse (400pA) | Vm         | AP width (ms) | AP height (mV) | Series resistance (mOhm) | AP threshold (rheobase) (pA) |
|---------------|------------------------|------------|---------------|----------------|--------------------------|------------------------------|
| 1             | 38                     | -58.404451 | 2.4           | 58.2           | 10.57525                 | 40                           |
| 2             | 35                     | -59.786331 | no data       | no data        | 16.9384                  | 40                           |
| 3             | no data                | -29.241934 | 3.2           | 58.8           | 8.161445                 | no data                      |
| 4             | 22                     | -60.327289 | 2.8           | 56.78          | 9.65895                  | 20                           |
| 5             | 18                     | -56.689655 | 2.7           | 58.42          | 10.6655                  | 40                           |
| 6             | 36                     | -58.790888 | 1.9           | 55             | 7.887045                 | 40                           |

  

| ThGrin1KO+BaCl2 | n spikes/pulse (400pA) | Vm         | AP width (ms) | AP height (mV) | Series resistance (mOhm) | AP threshold (rheobase) (pA) |
|-----------------|------------------------|------------|---------------|----------------|--------------------------|------------------------------|
| 1               | 1                      | -59.085578 | 3.5           | 49.59          | 2.7568275                | 20                           |
| 2               | 35                     | -61.448059 | 2.3           | 54.28          | 5.359366667              | 20                           |
| 3               | 31                     | -49.685535 | 2.9           | 59.09          | 2.664365                 | 20                           |
| 4               | 15                     | -57.210448 | 3.3           | 54.84          | 7.7939                   | 20                           |
| 5               | 30                     | -56.286068 | 2.17          | 53.64          | 5.73344125               | 20                           |
| 6               | 32                     | -53.44526  | 3.3           | 52             | 7.7788075                | 40                           |

  

| IONS+BaCl2 | n spikes/pulse (400pA) | Vm         | AP width (ms) | AP height (mV) | Series resistance (mOhm) | AP threshold (rheobase) (pA) |
|------------|------------------------|------------|---------------|----------------|--------------------------|------------------------------|
| 1          | 43                     | -56.443975 | 3.5           | 62.61          | 11.84376471              | 20                           |
| 2          | 32                     | -55.53124  | 2.8           | 61.23          | 8.17412                  | 20                           |
| 3          | 30                     | -55.53124  | 2.9           | 59.71          | 9.271853333              | 20                           |
| 4          | 30                     | -59.037062 | 2.3           | 59.24          | 8.92257                  | 20                           |
| 5          | 30                     | -54.863719 | 1.22          | 67.89          | 12.7815                  | 20                           |
| 6          | 30                     | -57.74748  | 1.96          | 47.21          | 11.09503333              | 20                           |

| <u>n spikes/pulse (400pA)</u> |     | <i>P-value</i> |
|-------------------------------|-----|----------------|
| Control vs. ThGrin1KO         | **  | 0.0019         |
| Control vs. IONS              | *** | <0.001         |
| Control vs. Control+BaCl2     | *** | <0.001         |
| Control vs. ThGrin1KO+BaCl2   | *** | <0.001         |
| Control vs. IONS+BaCl2        | *** | <0.001         |

| <u>AP height</u>            |     |        |
|-----------------------------|-----|--------|
| Control vs. IONS            | **  | 0.0036 |
| Control vs. Control+BaCl2   | *** | 0.0008 |
| Control vs. ThGrin1KO+BaCl2 | **  | 0.0045 |
| Control vs. IONS+BaCl2      | *** | <0.001 |

| <u>AP width</u>       |   |        |
|-----------------------|---|--------|
| Control vs. ThGrin1KO | * | 0.0221 |
| Control vs. IONS      | * | 0.0219 |

| <u>AP series</u>              |   |        |
|-------------------------------|---|--------|
| ThGrin1KO vs. ThGrin1KO+BaCl2 | * | 0.0445 |

Supplementary Table 3

Electrophysiology data analysis at P7

| Control | n spikes/pulse (100pA) | Vm     | AP width (ms) | AP height (mV) | Series resistance (mOhm) | AP threshold (rheobase) (pA) |
|---------|------------------------|--------|---------------|----------------|--------------------------|------------------------------|
| 1       | 2.8                    | -69.66 | 4.3           | 41.96          | nd                       | 100                          |
| 2       | 0.5                    | -70.09 | 6.1           | 37.75          | nd                       | 100                          |
| 3       | 5.2                    | -61.78 | 3.9           | 49.072         | 12.38                    | 50                           |
| 4       | 0.5                    | -67.64 | 2.5           | 57.28          | 9.5                      | 100                          |
| 5       | 0                      | -67.34 | 3.7           | 42.85          | 15.78                    | 150                          |
| 6       | 0                      | -62.48 | 4.5           | 37.23          | nd                       | 200                          |
| 7       | 1                      | -68.18 | 2.8           | 50.63          | nd                       | 50                           |
| 8       | 0                      | -60.69 | 4.1           | 47.64          | 19.98                    | 150                          |
| 9       | 0                      | -67.05 | 3.6           | 13.21          | 14.6                     | 150                          |

| IONS | n spikes/pulse (100pA) | Vm     | AP width | AP height | Series resistance (mOhm) | AP threshold (rheobase) (pA) |
|------|------------------------|--------|----------|-----------|--------------------------|------------------------------|
| 1    | 1.8                    | -70.61 | 4.8      | 43.21     | 14.61                    | 100                          |
| 2    | 12.14                  | -50.63 | 3.3      | 54.565    | 16.67                    | 20                           |
| 3    | 14.5                   | -68.59 | 3.1      | 49.13     | 18.04                    | 50                           |
| 4    | 1                      | -67.75 | 3.33     | 43.42     | 11.64                    | 100                          |
| 5    | 0                      | -69.32 | 2.9      | 52.36     | 14.71                    | 150                          |
| 6    | 4                      | -58.08 | 4.2      | 46.41     | 11.03                    | 100                          |
| 7    | 10.75                  | -57.09 | 4.4      | 47.058    | 9.26                     | 50                           |
| 8    | 3.5                    | -67.02 | 6.5      | 32.31     | 11.82                    | 100                          |
| 9    | 8.2                    | -53.8  | 2.4      | 60.64     | 9.26                     | 100                          |

| IONS+Kcna1 | n spikes/pulse (100pA) | Vm     | AP width   | AP height  | Series resistance (mOhm) | AP threshold (rheobase) (pA) |
|------------|------------------------|--------|------------|------------|--------------------------|------------------------------|
| 1          | 6.2                    | -61.31 | 5.2        | 12.6       | nd                       | 100                          |
| 2          | 1                      | -68.13 | 6          | 16.51      | 19.06                    | 100                          |
| 3          | 0                      | -62.88 | 5.4        | 41.9       | 8.84                     | 150                          |
| 4          | 0                      | -62.63 | 2          | 22.46      | 19.66                    | 200                          |
| 5          | 0                      | -74.44 | nd (no AP) | nd (no AP) | 7.96                     | nd (no AP)                   |

n spikes/pulse (100pA) *P-value*  
 Control vs. IONS \* 0.0235

AP height *P-value*  
 Control vs. IONS+Kcna1 \* 0.028  
 IONS vs. IONS+Kcna1 \*\* 0.0042
